# Supplementary material for: Generalized enrichment analysis improves the detection of adverse drug events from the biomedical literature
Source: PubMed Central journal article supplement (PMC4918084; doi:10.1186/s12859-016-1080-z), 2016-06-23

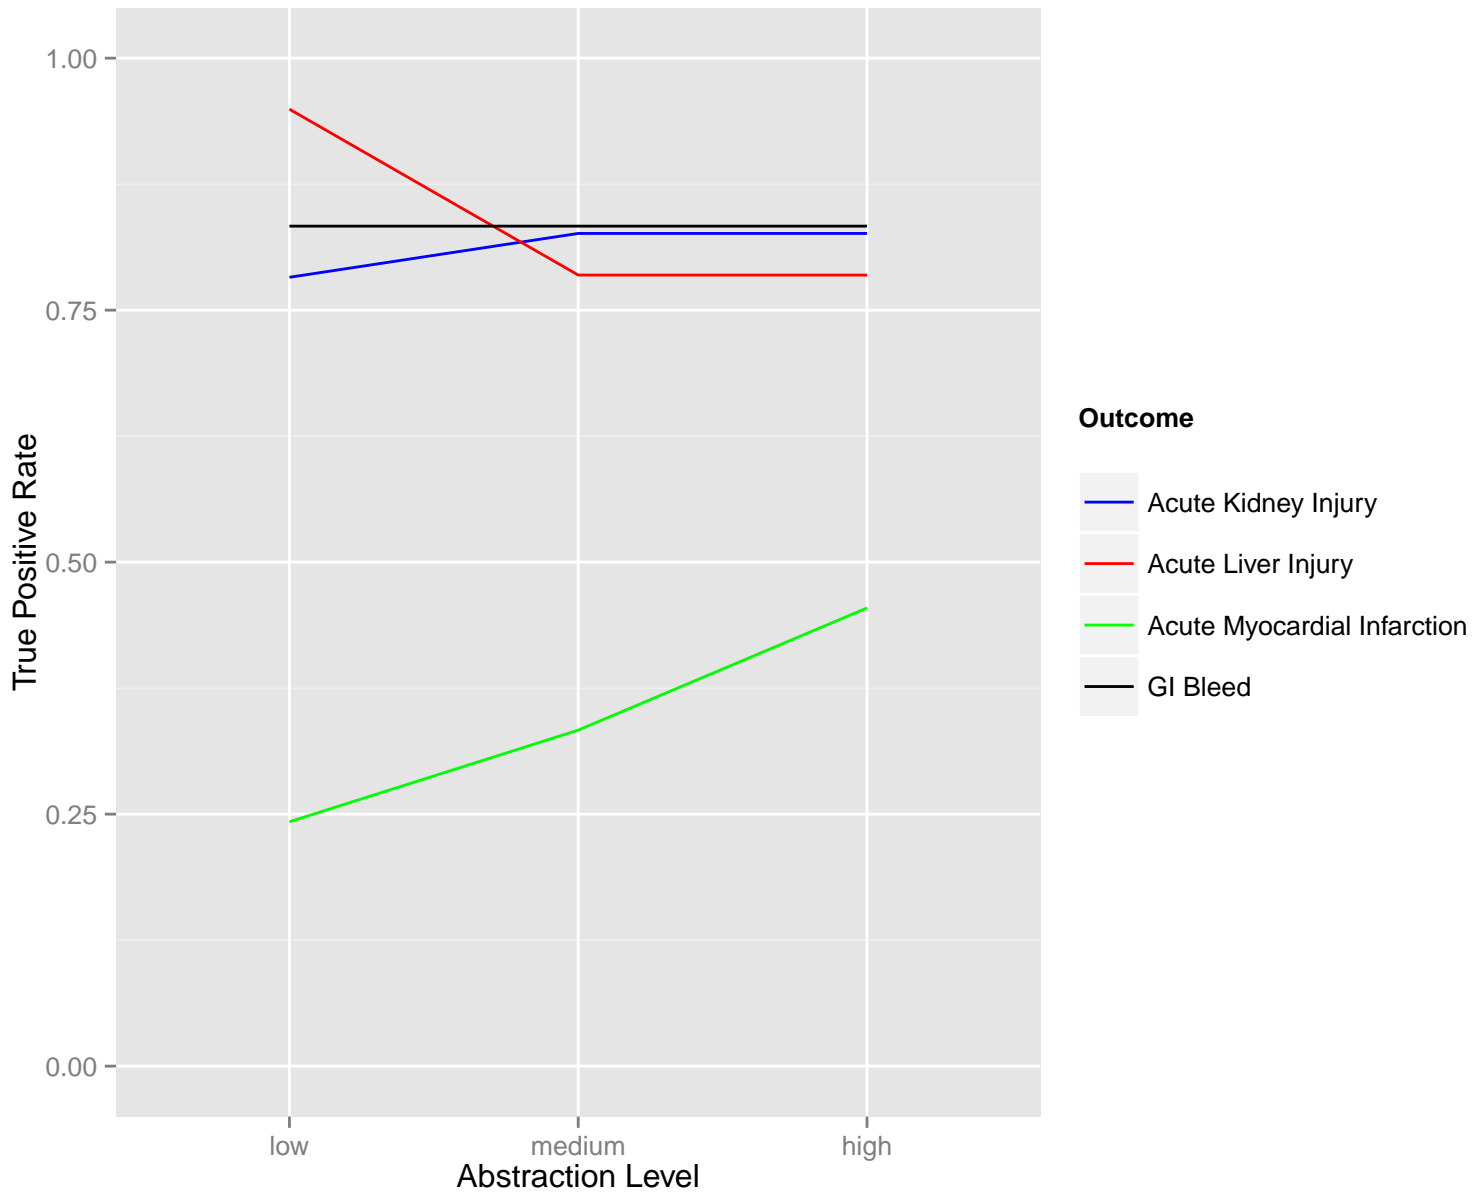

Supplement: 12859_2016_1080_MOESM5_ESM.pdf [file 12859_2016_1080_MOESM5_ESM.pdf]
