# Supplementary material for: Generalized enrichment analysis improves the detection of adverse drug events from the biomedical literature
Source: BMC Bioinformatics. 2016 Jun 23;17:250. doi: 10.1186/s12859-016-1080-z (PMC4918084; doi:10.1186/s12859-016-1080-z)
Supplement: Additional file 3: — Adverse event signals for drug classes detected by GEA and PRR. Adverse event signals for drug classes (ATC4 codes) detected by GEA and PRR using different thresholds at different aggregation levels. (XLSX 9 kb) [file 12859_2016_1080_MOESM3_ESM.xlsx]

## Sheet: Sheet1
p-value	GEA IC 7-10	GEA IC 4.5-6	GEA IC 1-5.5	PRR 2nd	PRR IC 7-10	PRR
< 0.1	28272	5694	6532	19007	42154	> 1
	(16433)	(4298)	(3532)
< 0.005	18179	4398	5209	14763	33750	> 1.5
	(9236)	(3260)	(2663)
< 1e-50	2400	1035	1218	5623	13861	> 5
	(746)	(595)	(309)
